# Supplementary material for: Eco-Friendly Preparation of Silver Nanoparticles and Their Antiproliferative and Apoptosis-Inducing Ability against Lung Cancer
Source: MDPI journal article supplement (doi:10.3390/life12122123), 2022-12-15
Supplement: s1 [file s1]

Supplementary File

# Eco-Friendly Preparation of Silver Nanoparticles and Their Antiproliferative and Apoptosis-Inducing Ability against Lung Cancer

Vivekananthan Suseela <sup>1,\*</sup>, Ramalingam Nirmaladevi <sup>2</sup>, Muthukrishnan Pallikondaperumal <sup>3</sup>, Ramasamy Shanmuga Priya <sup>3</sup>, Mohammed Rafi Shaik <sup>4</sup>, Althaf Hussain Shaik <sup>5</sup>, Mujeeb Khan <sup>4</sup> and Baji Shaik <sup>6,\*</sup>

- 1 Department of Biochemistry, P.S.G College of Arts and Science, Coimbatore 641014, Tamilnadu, India
  - 2 Department of Biochemistry, Biotechnology and Bioinformatics, Avinashilingam Institute for Home Science and Higher Education for Women, Coimbatore 641043, Tamilnadu, India; nirmaladevisaravanan32@gmail.com
  - 3 Department of Microbiology, P.S.G College of Arts and Science, Coimbatore 641014, Tamilnadu, India; pmamatrixschool@gmail.com (M.P.); priyajasper@gmail.com (R.S.P.)
  - 4 Department of Chemistry, College of Science, King Saud University, P.O. Box 2454, Riyadh 11451, Saudi Arabia; mrshaik@ksu.edu.sa (M.R.S.); kmujeeb@ksu.edu.sa (M.K.)
  - 5 Department of Zoology, College of Science, King Saud University, P.O. Box 2454, Riyadh 11451, Saudi Arabia; salthaf@ksu.edu.sa
  - 6 School of Chemical Engineering, Yeungnam University, Gyeongsan 38541, Republic of Korea
- \* Correspondence: suseelavivek@gmail.com (V.S.); shaikbaji@yu.ac.kr (B.S.)

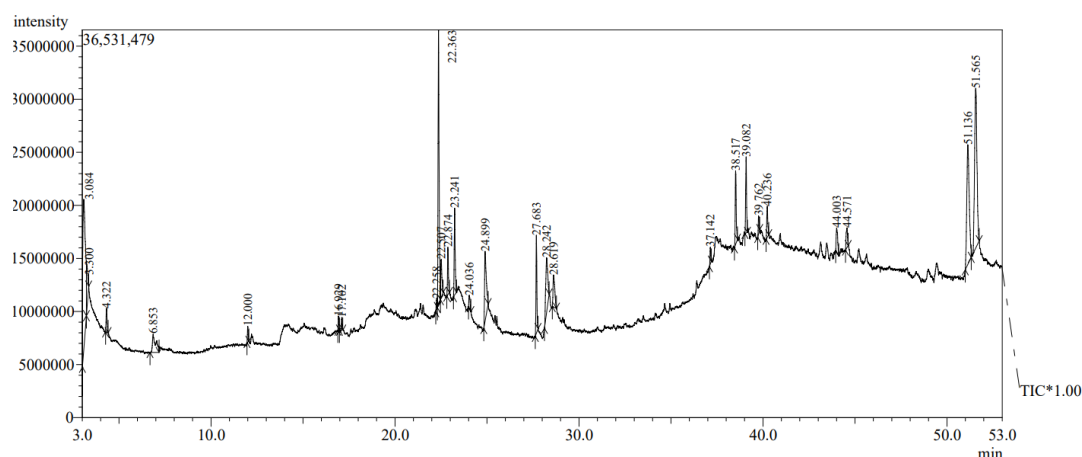

**Figure S1:** GC-MS analysis of ethanolic extract of *Tabebuia rosea-alba* leaves [1].

**Table S1:** Bioactive Constituents Identified in the Ethanolic Extract of *Tabebuia rosea- alba* Leaves by GC-MS Analysis [1].

| RT     | Molecular formula                              | Molecular weight | Name of the compound                                                                                  |
|--------|------------------------------------------------|------------------|-------------------------------------------------------------------------------------------------------|
| 22.367 | C <sub>20</sub> H <sub>40</sub> O              | 296              | 2-hexadecen-1-ol<br>3,7,11,15,-tetramethylhexadec-2-en-1-ol<br>3,7,11,15-tetramethyl-2-hexadecen-1-ol |
| 22.508 | C <sub>20</sub> H <sub>40</sub>                | 280              | 2-hexadecene<br>3,7,11,15-tetramethyl-[R-[R*R*-(E)]<br>3,7,11,15-tetramethyl-2-hexadecene             |
| 24.900 | C <sub>18</sub> H <sub>34</sub> O <sub>2</sub> | 282              | 9-octadecenoic acid (Z)<br>octadec-9-enoic acid                                                       |
| 27.683 | C <sub>20</sub> H <sub>40</sub> O              | 296              | Phytol<br>2-hexadecen-1-ol<br>trans – Phytol<br>3,7,11,15-tetra methyl-2-hexadecen-1-ol               |
| 28.242 | C <sub>20</sub> H <sub>34</sub> O <sub>2</sub> | 306              | 8,11,14- eicosatrienoic acid (Z,Z,Z)                                                                  |

|        |                                   |     |                                                                                                                               |
|--------|-----------------------------------|-----|-------------------------------------------------------------------------------------------------------------------------------|
| 39.083 | C <sub>30</sub> H <sub>50</sub>   | 410 | Squalene<br>2,6,10,14,18,22-tetracosahexaene<br>Spinacene                                                                     |
| 51.136 | C <sub>29</sub> H <sub>50</sub> O | 414 | Stigmast-5-en-3-ol<br>(3.BETA.,24S) stigmast-5-en-3-ol<br>Beta-Sitosterol<br>Stigmast-5-en beta-ol<br>Alpha-dihydrofucosterol |
| 51.567 | C <sub>29</sub> H <sub>50</sub> O | 414 | Stigmast-5-en-3-ol<br>(3.BETA.,24S) stigmast-5-en-3-ol                                                                        |

**Table S2:** Biological Activities of the Phytoconstituents Identified in the Ethanolic Extract of *Tabebuia rosea-alba* Leaves by GC-MS Analysis [1].

| % Area             | Name of the compound                                                                                                          | Biological activity**                                                                                                                                                                         |
|--------------------|-------------------------------------------------------------------------------------------------------------------------------|-----------------------------------------------------------------------------------------------------------------------------------------------------------------------------------------------|
| 12.57              | 2-hexadecen-1-ol<br>3,7,11,15,-tetramethylhexadec-2-en-1-ol<br>3,7,11,15-tetramethyl-2-hexadecen-1-ol                         | Antimicrobial, Anticancer,<br>Anti-inflammatory, Diuretic                                                                                                                                     |
| 2.01               | 2-hexadecene<br>3,7,11,15-tetramethyl-[R-[R*R*-(E)]<br>3,7,11,15-tetramethyl-2-hexadecene                                     | Transplant rejection treatment,<br>Anticarcinogenic,<br>Multiple sclerosis treatment,<br>Gaucher disease treatment,<br>Metabolic disease treatment.                                           |
| 5.18               | 9-octadecenoic acid (Z)<br>octadec-9-enoic acid                                                                               | Cancer preventive,<br>Flavor, Hypocholesterolemic,<br>5-Alpha reductase inhibitor,<br>Antiandrogenic, Perfumery, Insectifuge,<br>Anti-inflammatory, Anemiagenic,<br>Dermatitigenic, Choleric. |
| 3.54               | Phytol<br>2-hexadecen-1-ol<br>trans – Phytol<br>3,7,11,15-tetra methyl-2-hexadecen-1-ol                                       | Pesticide, Perfumery, Anti-feedent,<br>Haepato protective, Anti-inflammatory,<br>Analgesic, Antibacterial activity.                                                                           |
| 4.80               | 8,11,14- eicosatrienoic acid (Z,Z,Z)                                                                                          | Cardio protective, Hypocholesterolemic,<br>Anticancer, Anticoronary.                                                                                                                          |
| 2.85               | Squalene<br>2,6,10,14,18,22-tetracosahexaene<br>Spinacene                                                                     | Antibacterial, Antitumor, Antioxidant,<br>Immunostimulant, Hypocholesterolemic,<br>Lipoxygenase-inhibitor.                                                                                    |
| 12.42 and<br>16.21 | Stigmast-5-en-3-ol<br>(3.BETA.,24S) stigmast-5-en-3-ol<br>Beta-Sitosterol<br>Stigmast-5-en beta-ol<br>Alpha-dihydrofucosterol | Cytotoxicity against human, Diuretic,<br>Hepatoprotective, Anti-microbial, Anti-<br>inflammatory, Anticancer,<br>Antiasthma.                                                                  |

\*\*Source: Dr. Duke's phytochemical and ethnobotanical databases (Online database).

#### Reference:

1. Suseela, V.; Nirmaladevi, R. Quantitative Phytochemical Screening and GC-MS Analysis of the Ethanolic Extract of *Tabebuia roseo-alba* (Ridl) Sand. *Indian J. Nutr. Diet.* **2021**, *58*, 317–325.
